# Supplementary material
Source: publisher figshare collection journal article supplement (https://frontiersin.figshare.com/ndownloader/files/26512871)
Supplement: Supplementary file 1 [file 26512871]

## Sheet: Geography
Source: Evaluating DNA barcoding for species identification and discovery in European gracillariid moths. Frontiers.
TABLE S9. Geographical distribution of 39 species with multiple BINs.
Taxon	BIN name	N specimens per BIN	Distribution	Species with several BINS with Allopatric distribution	Species with BINs with sympatric distribution
35 species with either allopatric or sympatric BINs
Aspilapteryx tringipennella	BOLD:AAD1923	40	Europe		1
	BOLD:ABY5173	13	Austria & Slovenia
Caloptilia alchimiella	BOLD:AAD2588	35	UK, Belgium , Finland, Germany , Austria , Slovenia , France , Italy , The Netherlands, Norway	1
	BOLD:ABY8025	2	Portugal, Belarus
	BOLD:ACF1674	7	Italy, Slovenia, Romania
	BOLD:ACF1676	2	France
Caloptilia aurantiaca	BOLD:ABX6355	3	Madeira	1
	BOLD:AAO0196	2	Canary islands
Caloptilia falconipennella	BOLD:AAI6854	38	Austria, Germany, Finland		1
	BOLD:ADK4903	8	Austria, Germany, Finland
Caloptilia honoratella	BOLD:ACE4089	22	Czech Rep., Austria, Germany, Croatia (Punat)		1
	BOLD:AAD2623	6	Czech Rep., Germany, Spain, France, Croatia (Punat)
Caloptilia stigmatella	BOLD:AAA9984	71	UK, Portugal, Finland, Germany, Austria, Slovenia, France, Spain, Norway, Italy, Russia, Croatia, Japan	1
	BOLD:AAN2615	5	Germany, The The Netherlands
Calybites phasianipennella	BOLD:AAD6298	26	UK, Germany, Finland, Austria, Slovenia, France, Italy, Norway, Poland		1
	BOLD:AAD6299	10	Portugal, Czech Rep., Belgium, Romania, Slovenia, Germany, Austria
Gracillaria loriolella	BOLD:AAI6855	12	Cezch Rep., Austria, France (Mercantour), Germany, Italy	1
	BOLD:AAI6856	2	Spain, France (La Chapelle -sur-Loire)
Micrurapteryx kollariella	BOLD:AAK6167	9	Germany (Muenchen, Froettmaninger Heide ), Austria, Italy, Romania, France	1
	BOLD:AAZ7580	1	Slovenia
	BOLD:ACE5934	3	Italy
	BOLD:ACF0587	2	Germany (Kellberg, Buchsee ; Bad Abbach, Oberndorf )
Parectopa ononidis	BOLD:AAE3311	29	Hungary, Spain, Finland, Austria, France (Continvoir, La Bretiniere, La Chapelle -sur-Loire), The The Netherlands, Bulgaria, Germany, Russia, Norway, Croatia	1
	BOLD:AAY4988	1	France: Fontan (Alpes Maritimes)
Parornix anglicella	BOLD:AAL3861	15	Austria, Finland, Germany (Bavaria), Italy, Norway, Russia (Novosibirsk, Kanty-Mansi), UK		1
	BOLD:ABV8044	5	Austria, Russia (Novosibirsk, Tyumen, Tomsk)
	BOLD:ABZ6947	25	Austria, Bulgaria, Finland, France, Germany, Russia (Krasnoyarsk, Altai)
Parornix betulae	BOLD:AAE3418	90	Austria, Canada (BC, NT, NS, ON, PEI, QB, YU), Finland (north), Germany, The Netherlands, Norway, Russia, UK		1
	BOLD:ABZ4246	12	Canada (ON), Finland (South), Germany (Niederbayern, Oberpfalz), The Netherlands, Russia
Parornix petiolella	BOLD:AAQ1312	6	Austria, Bulgaria	1
	BOLD:ABX7637	3	Germany (Bavaria)
Parornix polygrammella	BOLD:AAI4051	3	Finland (Lapponia sompiensis, Lapp. inarensis), Norway (Aust-Agder)	1
	BOLD:ACY9589	2	Finland (Ostrobottnia ouluensis), Norway (Hedmark)
Parornix scoticella	BOLD:AAL3871	4	Belgium, Italy (Lazio), Portugal, Russia	1
	BOLD:ACL5615	1	Italy (Alpi Marittime)
	BOLD:ABW7162	1	Germany
Parornix szocsi	BOLD:ABX0118	3	Austria	1
	BOLD:AAL3868	2	France, Spain
Phyllocnistis saligna	BOLD:AAQ1589	23	Austria (Kaernten, Vorarlberg), Finland, France, Germany, Italy, Latvia, Spain		1
	BOLD:ABW1114	9	Austria (Kaernten), Czech Rep.
Phyllocnistis unipunctella	BOLD:AAD7979	73	Austria, Belarus, Belgium, Bulgaria, Finland, France, Germany, Italy, The Netherlands, Norway, UK	1
	BOLD:ABW8427	1	Spain
Phyllonorycter acerifoliella	BOLD:AAE6553	19	Austria, Belgium, Czech Rep., France, Germany, The Netherlands, Spain		1
	BOLD:AAE6554	15	Austria, Bulgaria, Croatia, Czech Rep., Germany, Italy, Slovenia
Phyllonorycter baetica	BOLD:AAC4266	3	Spain, LA toba	1
	BOLD:AAC4267	10	Spain , France
Phyllonorycter belotella	BOLD:AAF6223	5	Greece	1
	BOLD:AAF6224	10	France, spain, Portugal
Phyllonorycter cerasinella	BOLD:AAP5613	7	Slovenia, Austria,	1
	BOLD:AAL5418	5	Germany, France
Phyllonorycter corylifoliella	BOLD:AAA9517	28	Norway, Sweden, Finland, The Netherlands, Germany, Czechia, Slovakia, Italy, Siberia, Austria	1
	BOLD:AAD8125	12	Belgium, Germany, France, Italy
	BOLD:AAY4930	9	Albania, Bulgaria, Greece
	BOLD:AAZ3043	1	Greece (Crete)
Phyllonorycter esperella	BOLD:AAF6924	23	Austria, Czech Rep., UK, Slovenia, Austria, France, Germany, Albania, The Netherlands	1
	BOLD:ACE8122	4	Greece (Peloponnese)
Phyllonorycter junoniella	BOLD:AAD4754	39	Denmark, Czech Rep., Lithuania, Finland, Germany, Italy, Austria, Finland, The Netherlands, Belarus, Canada	1
	BOLD:ADD9962	2	Liechtenstein, Norway
Phyllonorycter macedonica	BOLD:ACG8675	2	Greece (Peloponnese)	1
	BOLD:ABU9411	3	Macedonia
Phyllonorycter maestingella	BOLD:AAH8496	44	Belgium, Germany, Sweden, Austria, France, Turkey, UK, Canada		1
	BOLD:AAL6962	134	UK, Italy, Austria, Slovenia, Croatia, Slovenia, France, Finland, Germany, The Netherlands, Norway, Liechtenstein, Canada, The United States
Phyllonorycter ochreojunctella	BOLD:AAL5177	7	Croatia, Italy, Slovenia, Bosnia and Herzegovina	1
	BOLD:ABW1121	1	France (Mercantour)
	BOLD:ACE3081	2	Spain (Granada)
	BOLD:ACE8665	3	France (Mediterranean coast), Spain (central east)
Phyllonorycter roboris	BOLD:AAE4718	7	Finland, Austria, Croatia		1
	BOLD:AAE4719	32	Albania, Austria, Croatia, Finland, France, Germany, Greece, Italy, Montenegro, Slovenia
	BOLD:AAP5674	15	Italy, Norway
Phyllonorycter salicicolella	BOLD:AAC4332	33	Czech Rep., UK, Sweden, Finland, Germany, Italy, France, Austria, The Netherlands		1
	BOLD:ACF5164	47	UK, Sweden, Belgium, Finland , Germany , Italy, France, Austria, Slovenia, Albania, Liechtenstein, Norway
Phyllonorycter scitulella	BOLD:ABW7421	5	Austria, Croatia, Slovenia	1
	BOLD:AAL5167	1	France
Phyllonorycter spinicolella	BOLD:AAE4697	14	Czech Rep., Austria, Bulgaria	1
	BOLD:AAE4698	13	UK, Germany , Slovenia , France , Italy , Bulgaria
Phyllonorycter triflorella	BOLD:AAE0261	4	Italy (Sicily), France	1
	BOLD:AAE0262	3	Greece, Croatia, Spain
	BOLD:ABX4886	5	France, Italy, Spain
Sabulopteryx limosella	BOLD:AAJ9158	25	Croatia, Czech, Germany, Austria, Slovenia, France, Italy, Macedonia, Romania	1
	BOLD:AAQ0866	5	Austria, Slovenia, France
Triberta helianthemella	BOLD:AAF6958	1	Spain, Zujar (Granada)	1
	BOLD:AAU3105	2	France, Ardeche & Mercantour
	BOLD:ABV8129	3	Italy: Mt Pastello (Verona) & Rocclamelone (piedmonte)
	BOLD:ACB8993	3	Germany (2): Kelheim, Ihrlerstein, `Brannt`; Austria (1): Perchtoldsdorfer Heide
	BOLD:AEF4848	2	Spain: Diezma (Granada) & Piornal (Caceres)
TOTAL				24	11
Four species with both allopatric and sympatric BINs
Caloptilia fribergensis	BOLD:AAY5586	19	Czech Rep., Austria, Germany		1
	BOLD:ABZ2267	3	Spain, Croatia, Iran	1
	BOLD:ADF4958	3	Germany, Austria		1
Phyllonorycter oxyacanthae	BOLD:ABZ8305	4	Czech Rep. (Milovice ; Brno), Bulgaria (Godech)	1
	BOLD:ACR3738	29	Germany, Austria, Slovnia, France, The Netherlands, Bulgaria (Sofia)		1
	BOLD:ADM6919	25	Spain, Germany, Austria, France, Slovenia, The Netherlands, Portugal, Belarus, Bulgaria (Sofia), Lebanon		1
	BOLD:ADM6745	1	Czech Rep. (Cechy pod Kosirem )	1
Phyllonorycter salictella	BOLD:AAA9516	99	Sweden, Denmark, Czech Rep., UK, Finland, Belgium, Germany, France, Austria, Italy, Poland, Hungary, Norway, Liechtenstein, Russia		1
	BOLD:AAA9518	35	Finland, UK, Germany, Austria, Japan		1
	BOLD:AAI2954	1	Spain	1
Phyllonorycter ulmifoliella	BOLD:AAE0303	31	France, Czech Rep., Finland, Austria, Slovenia, UK, Germany, The Netherlands, Russia, Sweden, Norway		1
	BOLD:AAT9523	2	Italy, South Tyrol	1
	BOLD:ABY9921	38	Czech Rep., Finland , Austria, France, The Netherlands, Germany , Russia, Norway		1
	BOLD:ACG2228	1	The United States	1
TOTAL				6	8
